# Supplementary figures and images for: Comparison of Different Pretreatment Processes Envisaging the Potential Use of Food Waste as Microalgae Substrate
Source: MDPI journal article supplement (doi:10.3390/foods13071018), 2024-03-26

FW 1

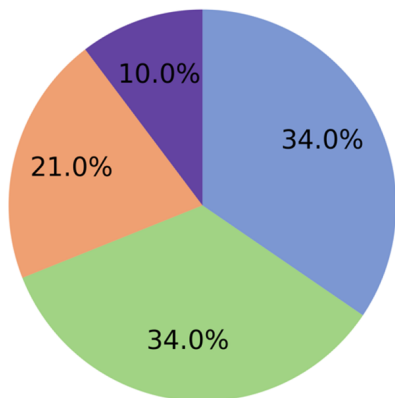

FW 2

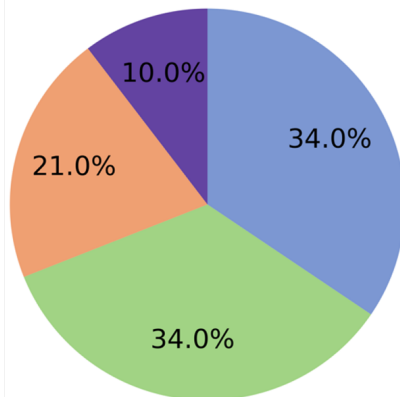

FW 3

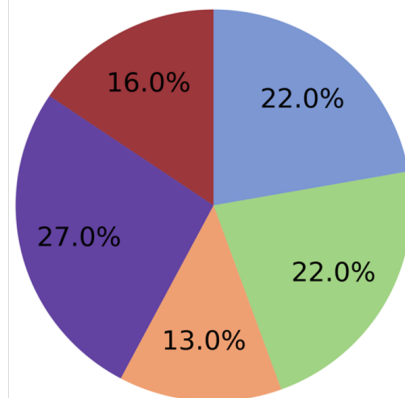

FW 4

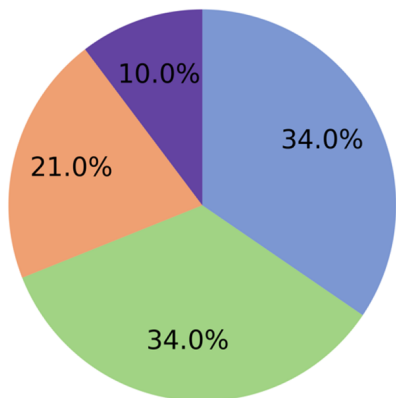

FW 5

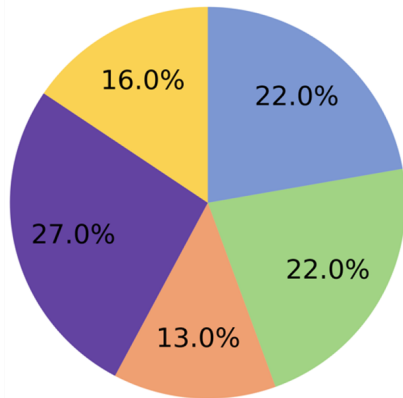

FW 6

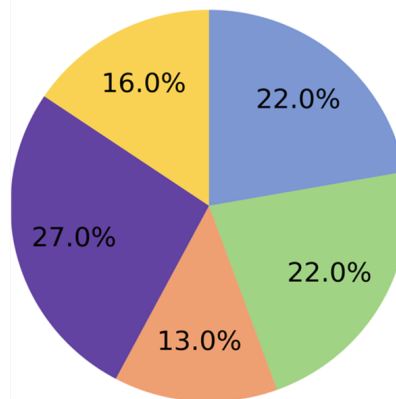

FW 7

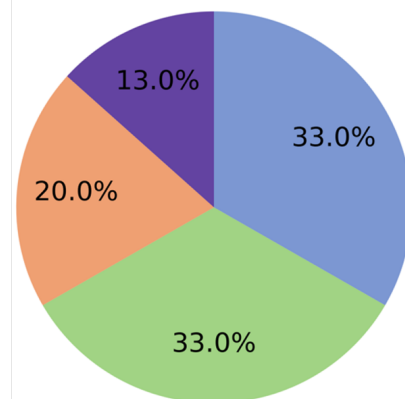

Supplement: s1 [file s1]

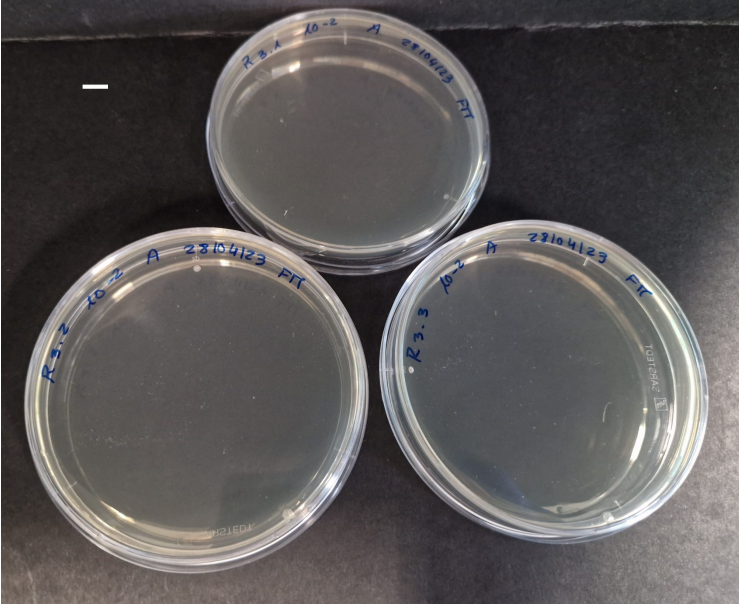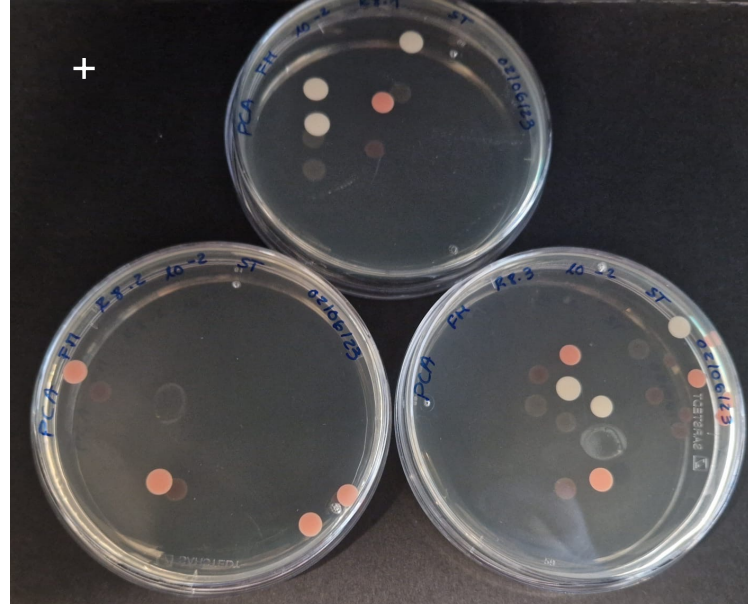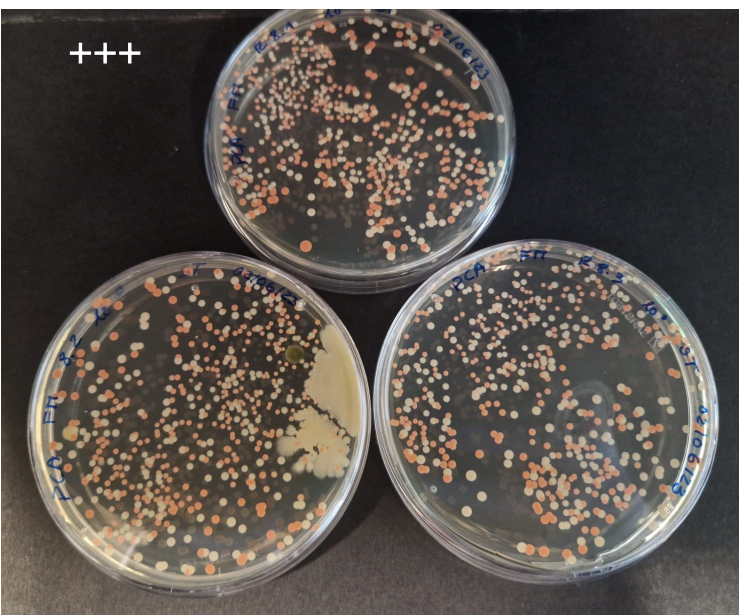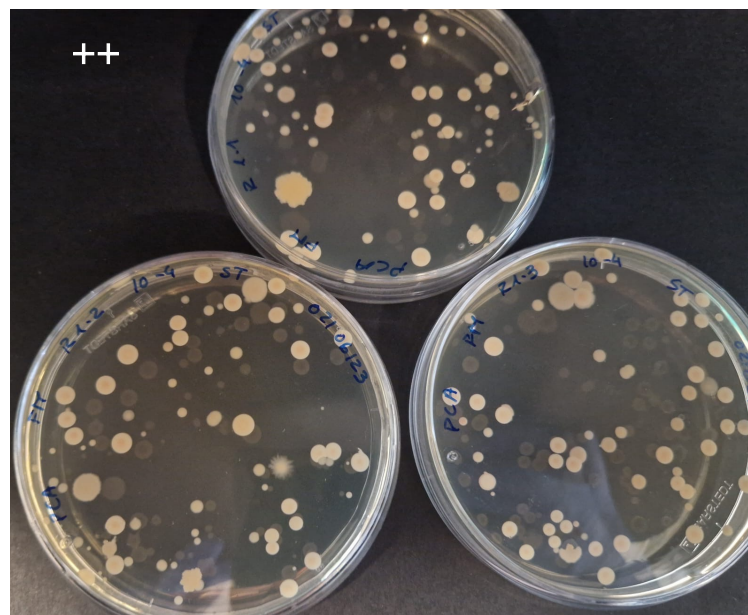

Supplement: s1 [file s1]
